# Supplementary material
Source: PubMed Central journal article supplement (PMC7808569)
Supplement: NIHMS1627021-supplement-mmc1.pdf [file NIHMS1627021-supplement-mmc1.pdf]

**Molecular Plant, Volume 13**

**Supplemental Information**

**Phosphorylation of the *Pseudomonas* Effector AvrPtoB by *Arabidopsis*  
SnRK2.8 Is Required for Bacterial Virulence**

**Lei Lei, Danielle M. Stevens, and Gitta Coaker**

1  
2  
3  
4  
5  
6  
7  
8  
9  
10  
11  
12  
13  
14  
15  
16  
17  
18  
19  
20  
21  
22  
23

**Phosphorylation of the Pseudomonas effector AvrPtoB by Arabidopsis SnRK2.8 is required for Bacterial Virulence**

**Running Title:** Phosphorylation of the AvrPtoB effector by SnRK2.8

**Authors and Affiliations:** Lei Lei<sup>1</sup>, Danielle M. Stevens<sup>1</sup>, Gitta Coaker<sup>1\*</sup>

<sup>1</sup>Department of Plant Pathology, University of California, Davis, Davis, CA, USA

\*Corresponding author: Gitta Coaker; Email: [glcoaker@ucdavis.edu](mailto:glcoaker@ucdavis.edu)

## 24 **Supplemental methods**

25

### 26 **Yeast two-hybrid screen**

27 The GAL4 based Matchmaker yeast two-hybrid system was used for the AvrPtoB-kinase  
28 interaction screen (Clontech). *AvrPtoB* and a *mCherry* negative control were cloned into the  
29 pGADT7 vector fused to the GAL4 activation domain and HA tag. *Arabidopsis SnRKs* and  
30 *CDPKs* were cloned into the pGBKT7 vector, which contains the GAL4 DNA binding domain  
31 and N-terminal Myc epitope tag. In order to detect interactions with CDPKs, their C-terminal  
32 Ca<sup>2+</sup> regulatory and auto-inhibitory domains were removed prior to clone into the pGBKT7  
33 vector. Primers are listed in Table S2. The pGADT7-*AvrPtoB* and pGADT7-*mCherry* plasmids  
34 were separately co-transformed with each pGBKT7-*SnRK/CPKΔC* plasmid into the yeast strain  
35 AH109, colonies were selected on SD -Leu/-Trp dropout media and tested for interactions on SD  
36 -Leu/-Trp/-His dropout media containing X- $\alpha$ -Gal. Yeast transformation and media preparation  
37 were performed per manufacturer instructions (Clontech). To confirm protein expression, yeast  
38 proteins were extracted as described previously and subjected to anti-HA HRP (Roche  
39 #12013819001; 1:2,000) and anti-Myc (Clontech #631206; 1: 2,000) immunoblotting (Zhang et  
40 al., 2011b).

41

### 42 **Plant protein extraction and immunoblotting**

43 Plant tissues were ground in liquid nitrogen and homogenized in Protein Extraction Buffer  
44 [(PEB: 50 mM Tris-HCl, pH 7.5, 1 mM EDTA, pH 8.0, 150 mM NaCl, 0.1% Triton X-100,  
45 0.5% IGEPAL, 5% glycerol, 1 mM PMSF, 3 mM DTT, 1  $\times$  CPI (Thermo Fisher Scientific), 1  $\times$   
46 PPI (Thermo Fisher Scientific), 50 mM MG132 (Sigma-Aldrich)] (Chen et al., 2017). The  
47 homogenate was cleaned by centrifuging at 14,000 rpm for 15 min at 4  $^{\circ}$ C, and boiled with 5  $\times$   
48 SDS buffer (250 mM Tris-HCl pH 6.8, 6% SDS, 0.5 M DTT, 30% glycerol, 0.08% bromophenol  
49 blue) for 10 min.

50

### 51 **Co-immunoprecipitation assays**

52 To confirm the association between AvrPtoB and SnRK/CDPKs *in planta*, kinase dead variants  
53 were generated and tested for their ability to associate with wild-type AvrPtoB after transient  
54 expression in *N. benthamiana*. *SnRK1.1-KD* (K71A), *SnRK2.6-KD* (K50A), *SnRK2.8-KD*  
55 (K33A), *CPK4ΔC-KD* (K54A) and *CPK5ΔC-KD* (K126A) kinase dead variants were generated  
56 by PCR-based site-directed mutagenesis and fused with a C-terminal HA tag in the binary vector  
57 pGWB414 (Nakagawa et al., 2007). Primers are listed in Table S3. *AvrPtoB* fused with a C-  
58 terminal GFP tag was cloned into the dexamethasone (Dex)-inducible binary vector pTA7001  
59 (Gu and Innes, 2011). Binary vectors were transformed into *Agrobacterium tumefaciens*  
60 GV3101. *Agrobacterium* suspensions were co-infiltrated into *N. benthamiana* leaves at an  
61 OD600 = 0.4 for AvrPtoB and an OD600 = 0.6 for each kinase. Twenty-four hours post-  
62 inoculation, 15 μM DEX and 0.01% Silwet L-77 were sprayed to induce the expression of  
63 AvrPtoB-GFP. Two grams of leaf tissue per sample were collected three hours post-DEX  
64 application.

65 For immunoprecipitations, *N. benthamiana* leaf tissues were ground in liquid nitrogen and re-  
66 suspended in 2 mL IP buffer (50mM Tris-HCL pH7.5, 150mM NaCl, 0.1% Triton, 0.2% NP-40,  
67 1× complete protease inhibitor (Thermo Fisher Scientific #A32963) and 1× phosphatase inhibitor  
68 (Thermo Fisher Scientific #A32957), 1mM DTT, 40uM MG132, 0.5% PVP). Samples were  
69 centrifuged at 14,000 rpm for 15 min and filtered to remove debris using a poly-prep  
70 chromatography column (10 mL, Bio-Rad). The supernatant was incubated with 25 μL of anti-  
71 GFP agarose beads at 4°C for 1.5 hr. Beads were washed once with IP buffer by centrifuging at  
72 3000 rpm for two min and twice by filtration through a pierce centrifuge column (0.8 mL, Bio-  
73 Rad). Proteins were eluted from the beads by boiling in 2× Laemmli buffer for five min. Proteins  
74 were separated by SDS-PAGE and immunoblotted with anti-HA HRP (Roche #12013819001;  
75 1:2,000) and anti-GFP HRP (Miltenyi Biotec #130-091-833; 1:3,000).

76 To test the ability of AvrPtoB phosphorylation mutants to disrupt FLS2-BAK1 complex  
77 formation, *AvrPtoB* phospho-null mutants (S258A and S205AS210AS258A) were generated by  
78 PCR-based site-directed mutagenesis. Primers are listed in Table S2. *AvrPtoB* variants were  
79 fused with C-terminal 3× FLAG tag in binary vector pTA7001, and *FLS2* and *BAK1* were  
80 separately fused with C-terminal GFP tag and HA tag in binary vector pEarleyGate 103 and  
81 pGWB14 (Earley et al., 2006; Nakagawa et al., 2007). The binary vectors were transformed into

82 *Agrobacterium tumefaciens* GV3101. *FLS2*, *BAK1*, and *AvrPtoB* variants *Agrobacterium*  
83 suspensions were co-infiltrated into *N. benthamiana* leaves, 15  $\mu$ M DEX and 0.01% Silwet L-77  
84 were sprayed to induce the expression of *AvrPtoB* at 24 hpi for three hours, two grams of leaf  
85 tissue for each sample were collected after 15 min treatment with 5 mM  $MgCl_2$  or 10  $\mu$ M flg22.  
86 Immunoprecipitation was performed as described above.

87

### 88 **Recombinant protein purification**

89 *AvrPtoB* and *SnRK2.8* were cloned in *E.coli* expression vector pDEST15 (Invitrogen) fused with  
90 N-terminal GST tag, the constructs were transformed into *E.coli* BL21 (DE3). 200 mL of *E.coli*  
91 culture was grown at 28 °C until OD600 = 0.5. Protein expression was induced with 0.5mM  
92 IPTG at 16 °C for 12 hr. Cells were harvested by centrifuging at 5000 g 4 °C for 10 min and  
93 washed once with buffer A (0.1 M Tris-HCl pH 7.5, 150 mM NaCl, 1 mM PMSF, 1  $\times$  CPI, 10  
94 mM DTT and 10  $\mu$ M MG132). Cell pellets were resuspended in 3 mL of buffer A with 15  
95  $\mu$ g/mL lysozyme and incubated on ice for 30 min. Total protein was released by sonication and  
96 incubated with Glutathione Sepharose 4B (GE Healthcare #GE17-0756-01) at 4 °C for one hour.  
97 Agarose beads were washed three times with buffer A by centrifuging at 5000 g for 5 min.  
98 Proteins were eluted by incubating with buffer B (50 mM Tris-HCl pH8, 10 mM reduced  
99 Glutathione) for 10 min at room temperature (RT).

100

### 101 **Kinase activity assay**

102 An *in vitro* kinase activity assay was performed with recombinant proteins, 3  $\mu$ g of GST-  
103 *AvrPtoB* and 0.3-1  $\mu$ g GST-*SnRK2.8* were mixed in kinase buffer (20 mM Tris-HCl pH7.5, 10  
104 mM  $MgCl_2$ , 1 mM  $CaCl_2$ , 100  $\mu$ M ATP, 1 mM DTT). The kinase reaction was performed at  
105 30 °C for 30 min and stopped by 3  $\times$  Laemmli buffer. Protein samples were separated in SDS-  
106 PAGE and immunoblotted with anti-pSer antibody (Sigma #P3430; 1:1000) and anti-GST  
107 antibody (Sigma; 1: 3000).

108

### 109 **Phosphorylation site identification and quantification**

110 To identify AvrPtoB phosphorylation sites *in vivo*, *AvrPtoB-YFP* in the pBluescript vector was  
111 transiently expressed in Col-0 and *snrk2.8* protoplasts, protoplast preparation and transient  
112 transformation were performed as previously described (Yoo et al., 2007). 1 mL of protoplasts  
113 was transfected with 100 µg of plasmid and collected in 9 hr. Protein was released in IP buffer  
114 (without 0.5% PVP) and subject to GFP-IP as described above. Protein peptides were generated  
115 by in-solution trypsin digest as previously described and subjected to LC-MS/MS run by  
116 Orbitrap Fusion Lumos mass spectrometer (Thermo Fisher Scientific) (Minkoff et al., 2013).  
117 LC-MS/MS data was analyzed by software MaxQuant (Tyanova et al., 2016).

118 To quantify the phosphorylated peptides, an inclusion list of phosphopeptide and control  
119 peptides, including the Mono-isotopic precursor (m/z) and charge state (z), was generated by  
120 software Skyline based on previous MS data, as shown in Table S4 (MacLean et al., 2010). The  
121 peptide samples were scanned by Orbitrap Fusion Lumos mass spectrometer (Thermo Fisher  
122 Scientific) with a parallel reaction monitoring (PRM) method. The PRM data were analyzed by  
123 MaxQuant and Skyline, the peptides peak areas were exported for the quantification analysis.

124

### 125 **NPR1 and FLS2 accumulation**

126 To test the ability of AvrPtoB to inhibit NPR1 and FLS2 accumulation in *Arabidopsis* Col-0 and  
127 the *snrk2.8* knockout. DC3000 *-/-* carrying the empty vector (EV) or a plasmid expressing wild-  
128 type *AvrPtoB* were syringe infiltrated into Col-0 and *snrk2.8* at a concentration of  $1 \times 10^8$  CFU  
129 mL<sup>-1</sup> and proteins extracted after 4h (NPR1) and 8h (FLS2). The immunoblot was performed by  
130 anti-NPR1 (Agrisera #AS12 1854; 1:1000) and anti-FLS2 (Agrisera #AS12 1857; 1:5000)  
131 primary antibody followed by anti-rabbit-HRP (BioRad #170-5046; 1:3000) secondary antibody.

132 To test the ability of AvrPtoB phosphorylation mutants to inhibit NPR1 and FLS2 accumulation,  
133 *AvrPtoB* phospho-null mutants (S258A and S205AS210AS258A) and *AvrPtoB* phospho-mimic  
134 mutants (S258D and S205DS210DS258D) were generated by PCR-based site-directed  
135 mutagenesis. Primers are listed in Table S2. *AvrPtoB* variants were fused with C-terminal 3×  
136 FLAG tag in binary vector pTA7001, and *NPR1* and *FLS2* were separately fused with C-terminal  
137 HA tag and GFP tag in binary vector pEarleyGate 103 and pGWB14 (Earley et al., 2006;  
138 Nakagawa et al., 2007). The immunoblot was performed by anti-HA HRP (Roche

139 #12013819001; 1:2,000), anti-FLAG (Sigma #A8592; 1:3000), and anti-GFP HRP (Miltenyi  
140 Biotec #130-091-833; 1:3,000).

## Supplemental figure

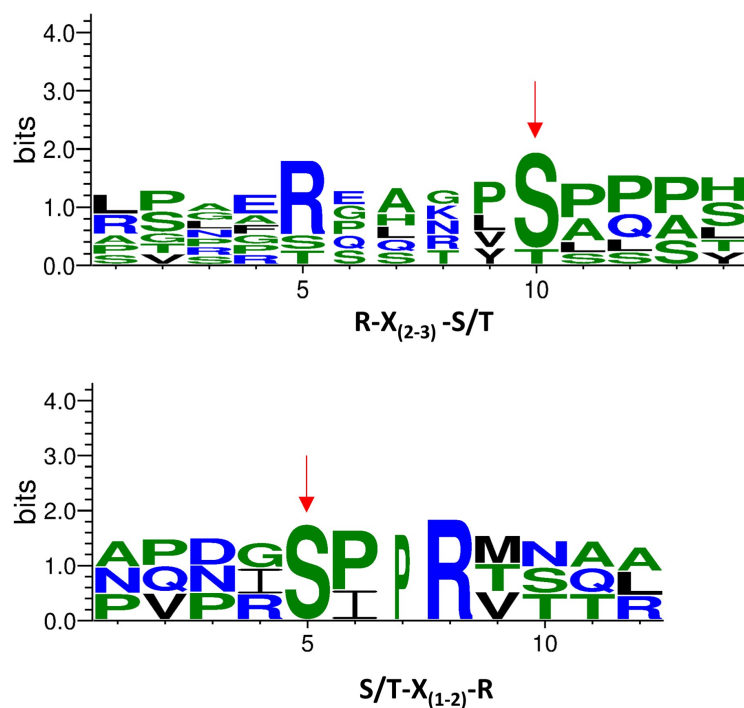

**Supplemental Figure 1. Amino acid conservation surrounding known effector phosphorylation sites. Related to Figure 1.**

WebLogo alignment of the effector phosphorylation sites shown in Table S1. Red arrows point the phosphorylated residues. Amino acid size correlates with degree of conservation. The sequence logo was created by the WebLogo 3 (Crooks et al., 2004).



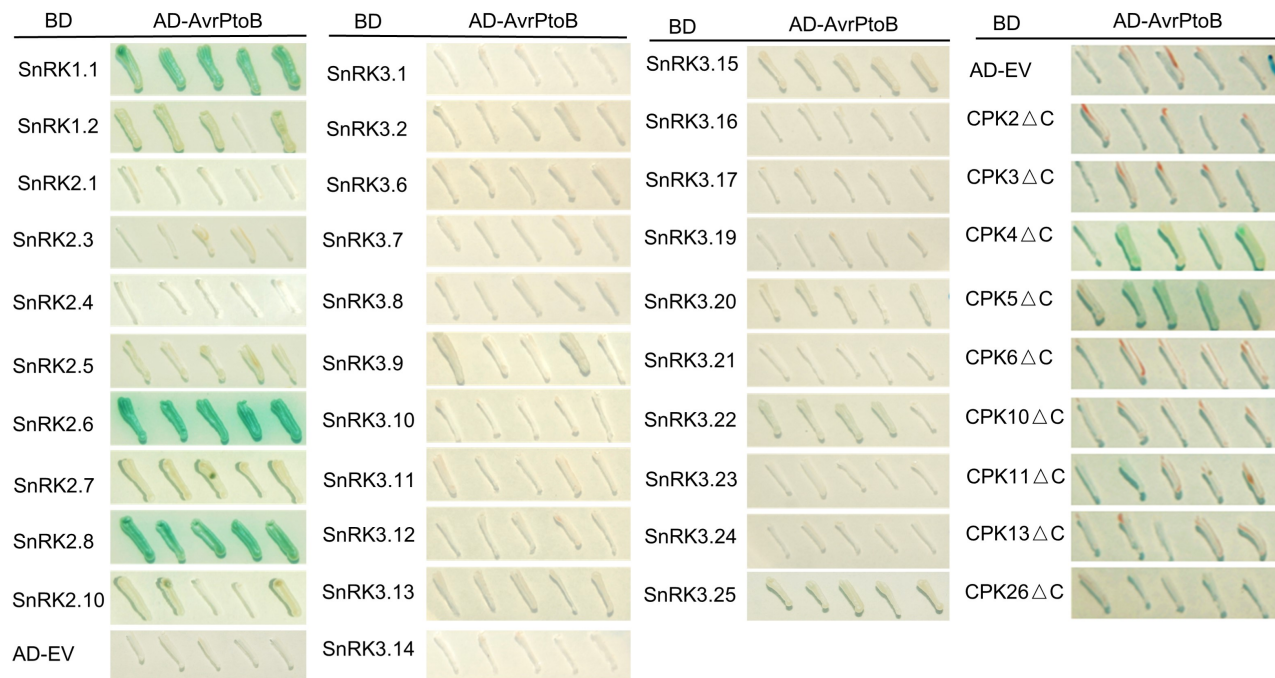

SD -Leu/-Trp/-His/X- $\alpha$ -gal

**Supplemental Figure 2. Yeast-two hybrid screening of interactions between the *Pseudomonas syringae* effector AvrPtoB and SnRK or CDPK members. Related to Figure 1.**

Yeast two-hybrid (Y2H) assay of AvrPtoB and SnRK-CDPKs in the Matchmaker Gal4 system. AvrPtoB was expressed from the pGADT7 vector, while SnRKs and C-terminal deletions of CPKs (CPKs $\Delta$ C) were expressed from the pGBKT7 vector in *Saccharomyces cerevisiae*. The pGBKT7 empty vector (EV) was included as a negative control. Blue colonies on SD -Leu/-Trp/-His/X- $\alpha$ -gal media indicate protein-protein interactions. AD = activation domain vector pGADT7, BD = binding domain vector pGBKT7.

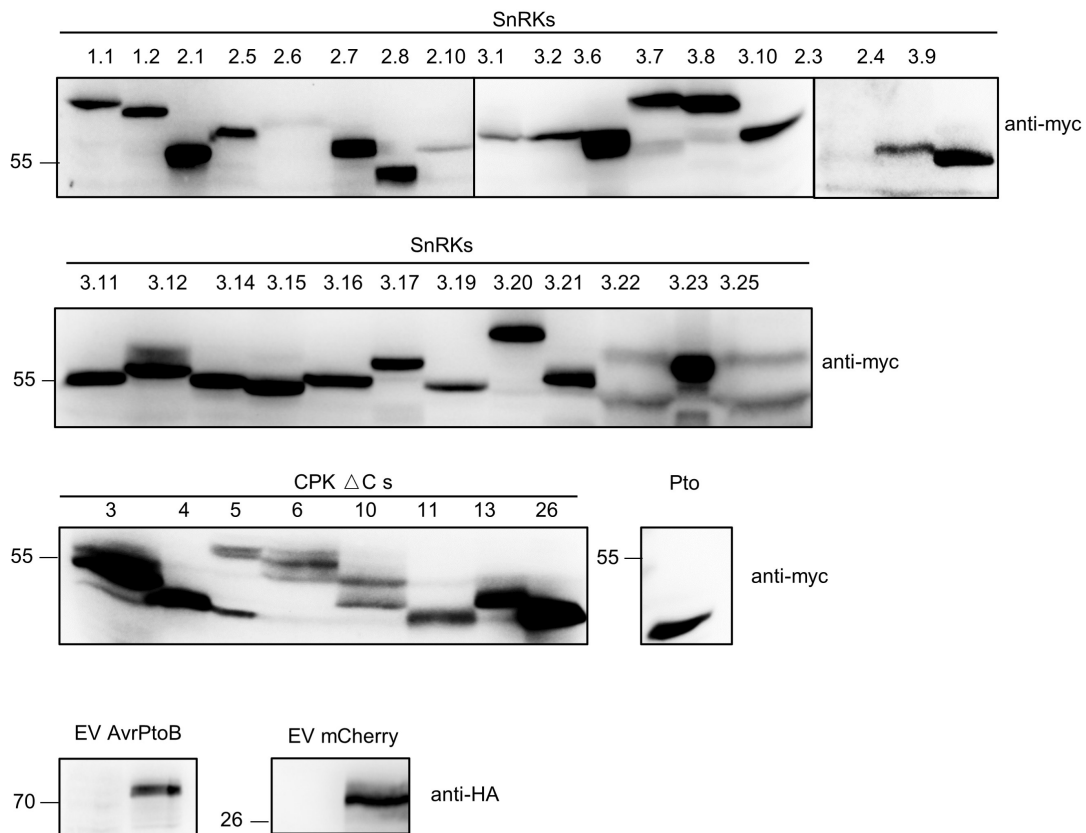

**Supplemental Figure 3. Protein expression of *SnRKs*, *CPKs*, and *AvrPtoB* used in the Y2H assay. Related to Figure 1.**

Yeast proteins were extracted and SnRK and CPK proteins were detected by anti-myc immunoblot and AvrPtoB was detected by anti-HA immunoblot. Expression of the positive (Pto) and negative (mCherry) controls used in Figure 1 are shown.

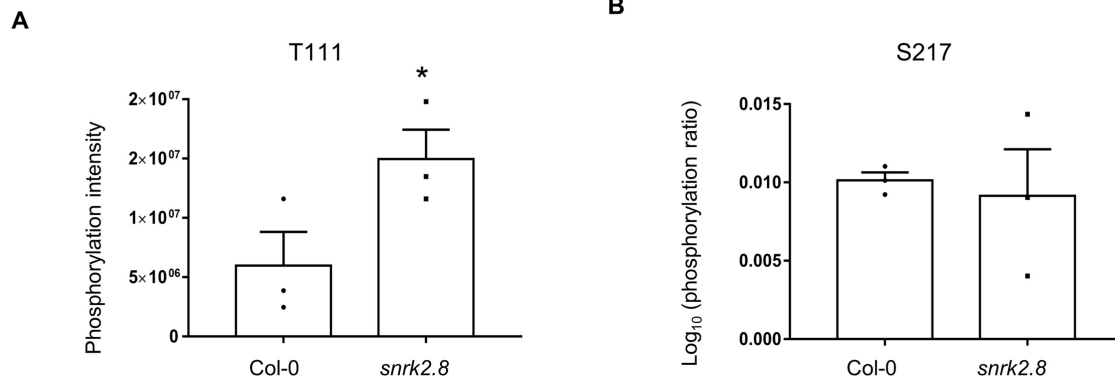

**Supplemental Figure 4. AvrPtoB T111 and S217 phosphorylation levels in the *snrk2.8* knockout compared to wild-type Col-0. Related to Figure 2.**

AvrPtoB-GFP was expressed in Col-0 and *snrk2.8* protoplasts, total proteins were subjected to anti-GFP IP followed by tryptic digestion. Phosphorylated peptides were detected by LC-MS/MS with the parallel reaction monitoring method. The peptide phosphorylation intensity of T111 (A) and the phosphorylation ratio of S217 (B) were determined using Skyline software. Data are means  $\pm$  SE of three biological replicates (separate transfections). Asterisks indicate significant differences (Student's t-test, \* $p < 0.05$ ).

| Organism                                 | Accession      | T111                | S205                                                | S210      | S217                | S258                |
|------------------------------------------|----------------|---------------------|-----------------------------------------------------|-----------|---------------------|---------------------|
| <i>P. syringae</i> pv. <i>tomato</i>     | WP_011104378.1 | E A R R T P E A T   | H Q Q A A S A P V R S P                             | - - - - - | T P T P A S P A     | T P V D R S P P R V |
| <i>P. amygdali</i> pv. <i>mellea</i>     | WP_155520414.1 | P A E T R I P R P Q | R Q Q A A S T P A R T A                             | - - - - - | T R P P A A R P P T | T P V D R S P P R V |
| <i>P. syringae</i> pv. <i>helianthi</i>  | WP_122391989.1 | R A E T R S T P Q   | R Q E A E S A P A R T P E R S P A R P P A S P I A T | - - - - - | T R P P A A R P P T | V R V D R S P P R V |
| <i>P. syringae</i> pv. <i>helianthi</i>  | WP_122386861.1 | R A E T R S T P Q   | R Q E A E S A P A R T P E R S P A R P P A S P I A T | - - - - - | T R P P A A R P P T | V R V D R S P P R V |
| <i>P. amygdali</i> pv. <i>hibisci</i>    | WP_122351091.1 | P A E T R I P R P Q | R Q Q A A S T P A R T A                             | - - - - - | T R P P A A R T P T | T P V D R S P P R V |
| <i>P. caricapapayae</i>                  | WP_122339706.1 | G A E T R R T P Q   | R Q E A A S A P A R T P E R S P A R P P A S P I A T | - - - - - | T R P P A A R P P T | V R V D R S P P R V |
| <i>P. amygdali</i> pv. <i>sesami</i>     | WP_122302383.1 | P A E T R I P R P Q | R Q Q A A S T P A R T A                             | - - - - - | T R P P A A R P P T | T P V D R S P P R V |
| <i>P. syringae</i> pv. <i>ribicola</i>   | WP_122292921.1 | E A R R T P E A T   | H Q Q A A S A P V R S P                             | - - - - - | T P A P P G P A     | T P V D R S P P R V |
| <i>P. amygdali</i> pv. <i>tabaci</i>     | WP_122234824.1 | P A E T R I P R P Q | R Q Q A A S T P A R T P                             | - - - - - | T R P P A A R T P T | T P V D R S P P R V |
| <i>P. amygdali</i> pv. <i>tabaci</i>     | WP_117139356.1 | P A E T R I P R P Q | R Q Q A A S T P A R T P                             | - - - - - | T R P P A A R T P T | T P V D R S P P R V |
| <i>P. amygdali</i> pv. <i>lachrymans</i> | WP_109724131.1 | P A E T R I P R P Q | R Q Q A A S T P A R T P                             | - - - - - | T R P P A A R T P T | T P V D R S P P R V |
| <i>P. caricapapayae</i>                  | WP_083493210.1 | G A E T R R T P Q   | R Q E A A S A P A R T P E R S P A R P P A S P I A T | - - - - - | T R P P A A R P P T | V R V D R S P P R V |
| <i>P. syringae</i> pv. <i>helianthi</i>  | WP_082441222.1 | R A E T R S T P Q   | R Q E A E S A P A R T P E R S P A R P P A S P I A T | - - - - - | T R P P A A R P P T | V R V D R S P P R V |
| <i>P. syringae</i> pv. <i>maculicola</i> | WP_080898572.1 | E A R R T P E A T   | H Q Q A A S A P V R S P                             | - - - - - | T P T P A S P A     | T P V D R S P P R V |
| <i>P. amygdali</i> pv. <i>lachrymans</i> | WP_080546441.1 | - A - - - - -       | H Q Q A A S A P V R S P                             | - - - - - | T P T P A S P A     | T P V D R S P P R V |
| <i>P. syringae</i> USA007                | WP_080270186.1 | E A R R T P E A T   | H Q Q A A S A P V R S P                             | - - - - - | T P T P A S P A     | T P V D R S P P R V |
| <i>P. avellanae</i>                      | WP_005618514.1 | E A R R T P E A T   | H Q Q A A S A P V R S P                             | - - - - - | T P T P A S P A     | T P V D R S P P R V |
| <i>P. amygdali</i> pv. <i>tabaci</i>     | RMV81218.1     | P A E T R I P R P Q | R Q Q A A S T P A R T P                             | - - - - - | T R P P A A R T P T | T P V D R S P P R V |
| <i>P. syringae</i> pv. <i>maculicola</i> | RMM81086.1     | E A R R T P E A T   | H Q Q A A S A P V R S P                             | - - - - - | T P T P A S P A     | T P V D R S P P R V |
| <i>P. amygdali</i> pv. <i>mori</i>       | KPX96454.1     | P A E T R I P R P Q | R Q Q A A S T P A R T P                             | - - - - - | T R P P A A R T P T | T P V D R S P P R V |
| <i>P. amygdali</i> pv. <i>mellea</i>     | KPX87239.1     | P A E T R I P R P Q | R Q Q A A S T P A R T A                             | - - - - - | T R P P A A R P P T | T P V D R S P P R V |
| <i>P. syringae</i> pv. <i>helianthi</i>  | KPX42453.1     | R A E T R S T P Q   | R Q E A E S A P A R T P E R S P A R P P A S P I A T | - - - - - | T R P P A A R P P T | V R V D R S P P R V |
| <i>P. caricapapayae</i>                  | KPW60468.1     | G A E T R R T P Q   | R Q E A A S A P A R T P E R S P A R P P A S P I A T | - - - - - | T R P P A A R P P T | V R V D R S P P R V |
| <i>P. amygdali</i> pv. <i>lachrymans</i> | EGH96534.1     | - A - - - - -       | H Q Q A A S A P V R S P                             | - - - - - | T P T P A S P A     | T P V D R S P P R V |
| <i>P. avellanae</i>                      | CAL69120.1     | E A R R T P E A T   | H Q Q A A S A P V R S P                             | - - - - - | T P T P A S P A     | T P V D R S P P R V |
| <i>P. syringae</i> pv. <i>maculicola</i> | AFI33132.1     | E A R R T P E A T   | H Q Q A A S A P V R S P                             | - - - - - | T P T P A S P A     | T P V D R S P P R V |
| <i>P. syringae</i> pv. <i>maculicola</i> | AFI33131.1     | - A - - - - -       | H Q Q A A S A P V R S P                             | - - - - - | T P T P A S P A     | T P V D R S P P R V |

**Supplemental Figure 5. Conservation of phosphorylated residues in different AvrPtoB homologs. Related to Figure 2.**

AvrPtoB phosphorylated residues identified by mass spectrometry were analyzed for their conservation across 27 AvrPtoB homologs from *P. syringae*. The translated sequence of *avrptoB* were used in BLAST searches against the NCBI nr database on January 5th, 2020 (*Pseudomonas syringae* group, taxid: 136849; default parameters otherwise) to identify homologs. Hits were filtered based on a minimum 65% sequence identity, a minimum 85% query coverage and an E-value of 0. Sequences were downloaded and aligned in Genious using Genious alignment (default parameters). The percentage of identity is shown by gradient white to black (white means less than 60% similar, gray means 60-80% similar, dark gray means 80-100%, and black means 100% similar). AvrPtoB phosphorylation sites identified *in vivo* are shown with arrows.

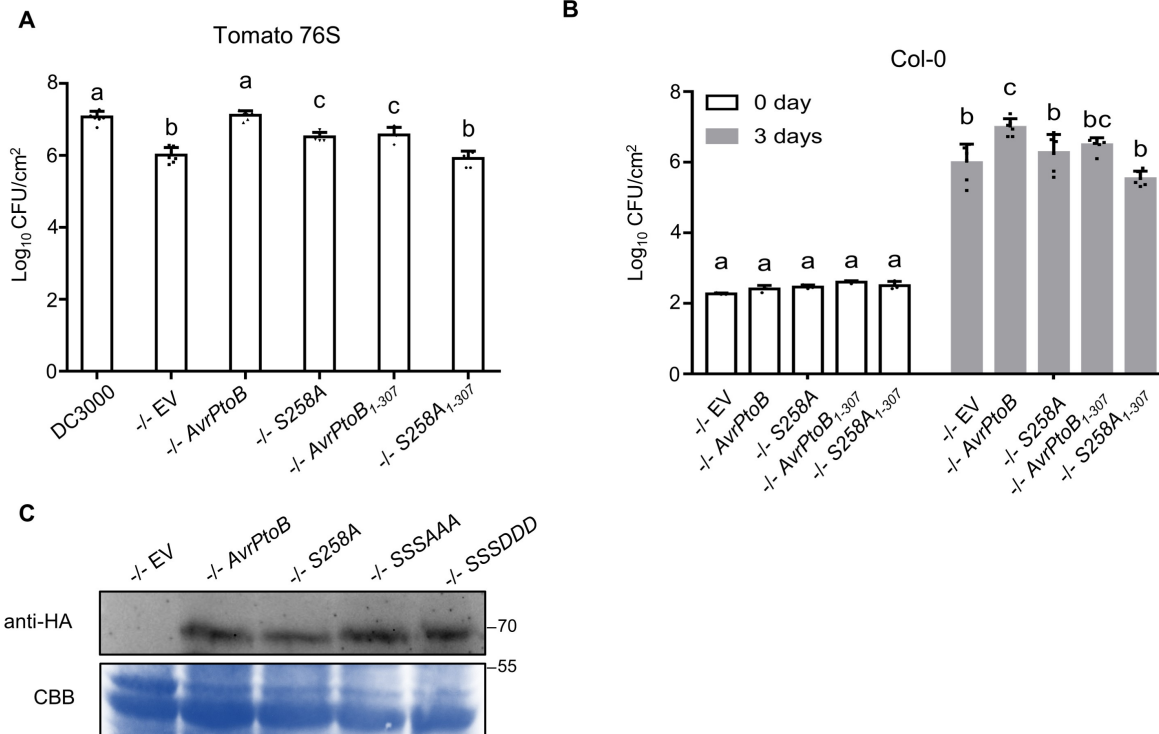

**Supplemental Figure 6. AvrPtoB S258 is required for virulence in tomato and *Arabidopsis*.**

**Related to Figure 3.**

(A) Bacterial populations in the susceptible tomato genotype Rio Grande 76S five days post-inoculation with *P. syringae* pv. *tomato* DC3000 $\Delta$ *avrPtoA* $\Delta$ *avrPtoB* (-/-) variants. DC3000 -/- carrying empty vector (EV) or plasmids expressing wild-type *AvrPtoB*, *AvrPtoB*<sub>S258A</sub>, *AvrPtoB*<sub>1-307</sub>, and *AvrPtoB*<sub>1-307S258A</sub> were dip inoculated on tomato at a concentration of  $2 \times 10^8$  CFU mL<sup>-1</sup> with 0.005% Silwet. Log<sub>10</sub> CFU/cm<sup>2</sup> = log<sub>10</sub> colony-forming units per cm<sup>2</sup> of leaf tissue. Data are means  $\pm$  SD (n  $\geq$  6 plants). Different letters indicate significant differences (one-way ANOVA, Tukey's test, p < 0.05).

(B) Bacterial populations in *Arabidopsis* Col-0 three days post-inoculation with DC3000 -/- variants. DC3000 -/- variants as described in (A) were syringe infiltrated in Col-0 at a concentration of  $2 \times 10^5$  CFU mL<sup>-1</sup>. Data are means  $\pm$  SD (n = 4 plants for day 0, n = 6 plants for day 3). Different letters indicate significant differences (two-way ANOVA, Tukey's test, p < 0.05).

(C) Expression of AvrPtoB-HA and its derivatives from DC3000 -/- . Bacteria were grown in minimal media at 18 °C. Anti-HA western blotting was performed to detect the expression of AvrPtoB in bacterial pellets.

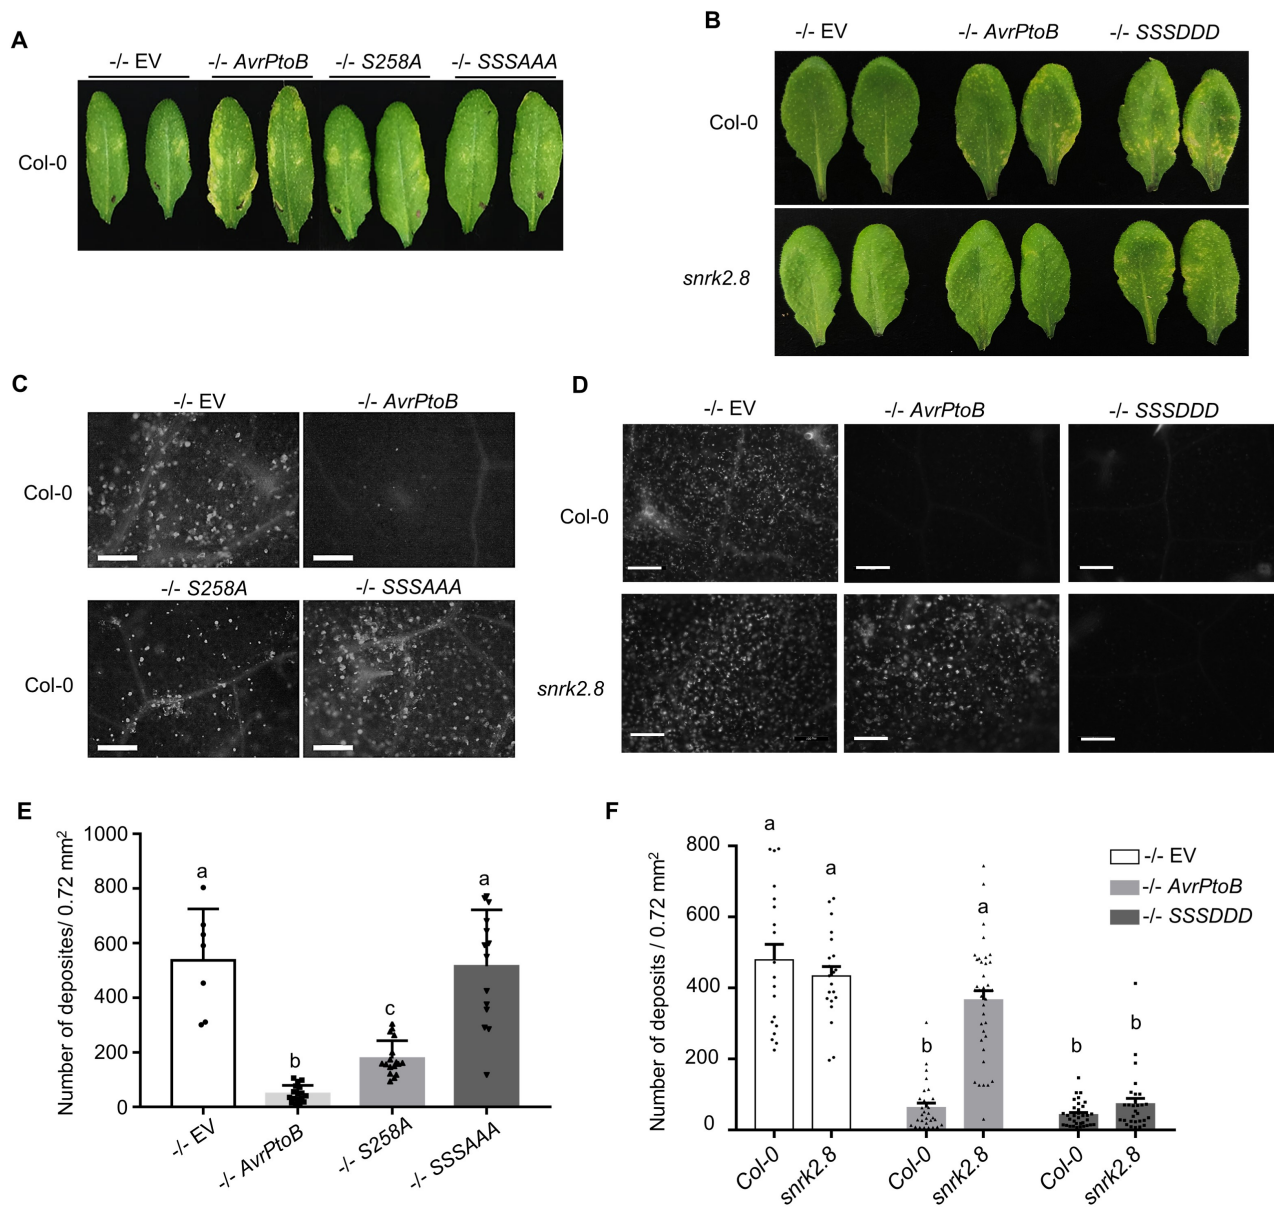

**Supplemental Figure 7. Phosphorylated AvrPtoB serine residues are required for virulence. Related to Figure 3.**

(A) Disease symptoms of *Arabidopsis* Col-0 after inoculation with *P. syringae* pv. *tomato* DC3000 $\Delta$ avrPto $\Delta$ avrPtoB (-/-) variants. DC3000 -/- carrying empty vector (EV) or plasmids expressing wild-type *AvrPtoB*, *AvrPtoB*<sub>S258A</sub>, or *AvrPtoB*<sub>S205AS210AS258A</sub> (SSSAAA) were syringe infiltrated into *Arabidopsis* Col-0 at a concentration of  $2 \times 10^5$  CFU mL<sup>-1</sup>. Disease symptoms were observed 4 days post-inoculation (dpi).

(B) Disease symptoms of *Arabidopsis* Col-0 after inoculation with *P. syringae* pv. *tomato* DC3000 $\Delta$ avrPto $\Delta$ avrPtoB (-/-) variants. DC3000 -/- carrying empty vector (EV) or plasmids expressing wild-type *AvrPtoB*, or *AvrPtoB*<sub>S205DS210DS258D</sub> (SSSDDD). Plant were treated as described in (A).

(C) Callose deposition in *Arabidopsis* Col-0 after inoculation with -/- carrying EV, *AvrPtoB*, *S258A*, and SSSAAA. Leaves were inoculated with *P. syringae* at a concentration of  $1 \times 10^8$  CFU mL<sup>-1</sup> and harvested 16h later. Leaves were stained by 1% aniline blue and imaged by fluorescence microscopy. Scale bar, 100  $\mu$ m.

(D) Callose deposition in *Arabidopsis* Col-0 after inoculation with -/- carrying EV, *AvrPtoB*, and SSSDDD. Leaves were inoculated and callose visualized as described in (C).

(E) Quantification of callose deposits. Data are means  $\pm$  SD (n = 8 images from 8 leaves for -/- EV, n = 18 images from 18 leaves for rest variants). Different letters indicate significant differences (one-way ANOVA, Tukey's test, p < 0.05).

(F) Quantification of callose deposits. Data are means  $\pm$  SD (n = 21 images from 21 leaves for -/- EV, n = 30 images from 30 leaves for rest variants). Different letters indicate significant differences (one-way ANOVA, Tukey's test, p < 0.05).

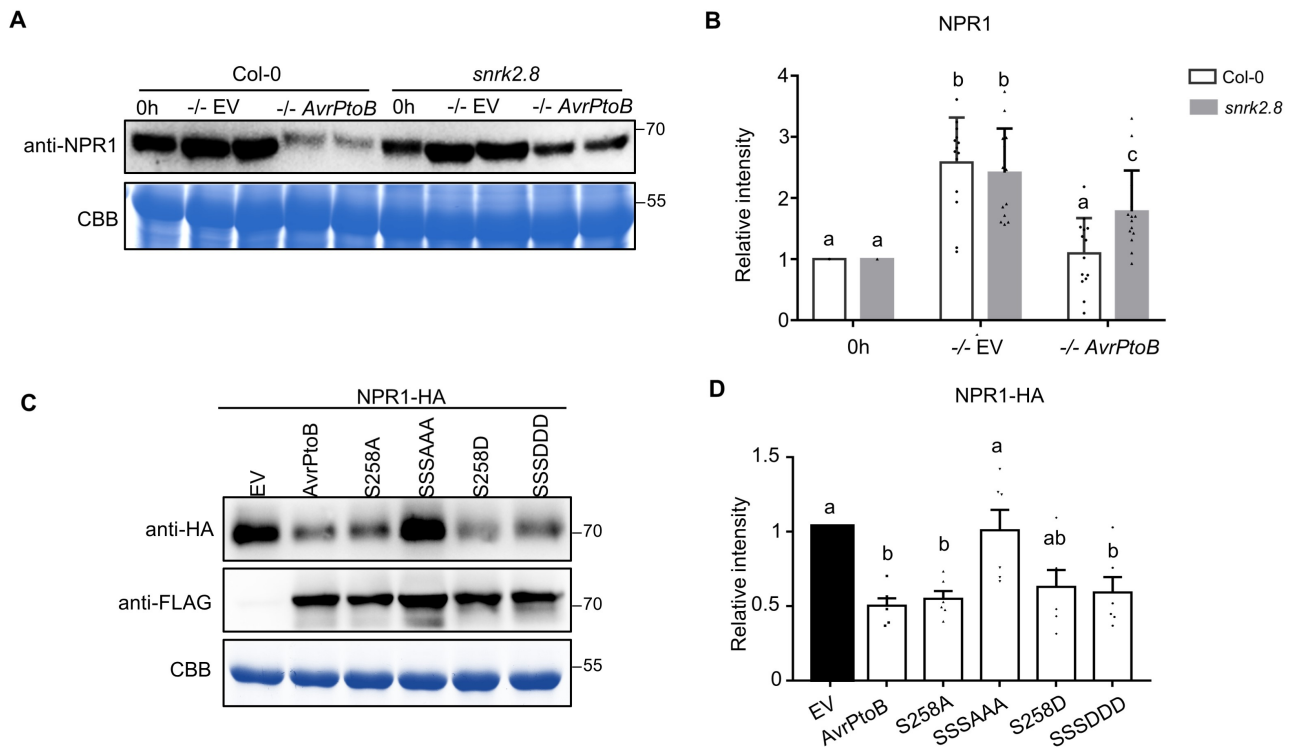

**Supplemental Figure 8. AvrPtoB mediated degradation of NPR1 requires the plant kinase SnrK2.8 and phosphorylated residues. Related to Figure 4.**

(A) NPR1 accumulation in *Arabidopsis* Col-0 and the *snrk2.8* knockout after inoculation with *P. syringae* pv. *tomato* DC3000 $\Delta$ *avrPto* $\Delta$ *avrPtoB* (-/-) variants. DC3000 -/- carrying the empty vector (EV) or a plasmid expressing wild-type *AvrPtoB* were syringe infiltrated into Col-0 and *snrk2.8* at a concentration of  $1 \times 10^8$  CFU mL<sup>-1</sup> and proteins extracted after four hours. Protein extracts were subjected to anti-NPR1 immunoblotting. Coomassie Brilliant Blue (CBB) staining shows equal protein loading.

(B) Quantification of NPR1-HA band intensity in (C). NPR1-HA bands intensities were quantified by Image Lab 6.0.1 (BIO-RAD). The values were normalized first by Rubisco bands and subsequently by the intensities of “EV” treatment. Data are means  $\pm$  SD (n = 6 leaves). Different letters indicate significant differences (one-way ANOVA, Tukey’s test, p < 0.05).

(C) NPR1 accumulation in the presence of AvrPtoB phosphorylation mutants in *N. benthamiana* after Agrobacterium-mediated transient expression. 35S::NPR1-HA was co-expressed with FLAG-tagged Dex-inducible *AvrPtoB*, *AvrPtoB*<sub>S258A</sub>, *AvrPtoB*<sub>S205AS210AS258A</sub> (SSSAAA), *AvrPtoB*<sub>S258D</sub> or *AvrPtoB*<sub>S205DS210DS258D</sub> (SSSDDD). The Dex inducible EV was used as a control. The expression of AvrPtoB-FLAG phosphorylation variants was induced by 15  $\mu$ M DEX for 5 hours 24h post-Agrobacterium infiltration. Protein extracts were subjected to anti-HA and anti-FLAG immunoblotting. CBB staining shows protein loading.

(D) Quantification of NPR1 band intensity in (A). NPR1 bands intensities were quantified by Image Lab 6.0.1 (BIO-RAD). The values were normalized first by Rubisco bands and subsequently by the intensities of “0h” bands. Data are means  $\pm$  SD (n = 14 leaves). Different letters indicate significant differences (one-way ANOVA, Tukey’s test, p < 0.05).

**Supplemental Table 1. The phosphorylation of bacterial type III effectors and their phosphorylation sites are identified by mass spectrometry. Related to Figure 1.**

Data were from the references in the table. Red indicates the phosphorylated residue.

| Effector | Pathogen                | Phosphorylation site                                                                                  | Host kinase                 | Required for virulence | Required for avirulence | Reference                                   |
|----------|-------------------------|-------------------------------------------------------------------------------------------------------|-----------------------------|------------------------|-------------------------|---------------------------------------------|
| AvrPto   | <i>P. syringae</i>      | NPNGS <sub>149</sub> IRMTL                                                                            | unknown                     | Yes                    | Yes                     | Anderson et al., 2006<br>Yeam et al., 2009  |
| AvrPtoB  | <i>P. syringae</i>      | PVDRS <sub>258</sub> PPRVNQQR                                                                         | unknown                     | Yes                    | Yes                     | Xiao et al., 2007                           |
|          |                         | QFSQLRT <sub>450</sub> ISKAD                                                                          | Pto/Fen ( <i>in vitro</i> ) | unknown                | Yes                     | Ntoukakis et al., 2009                      |
| HopQ1    | <i>P. syringae</i>      | PVLERSKS <sub>51</sub> APAL                                                                           | SnRK ( <i>in vitro</i> )    | Yes                    | unknown                 | Li et al., 2013<br>Giska et al., 2013       |
| AvrB     | <i>P. syringae</i>      | unknown                                                                                               | RIPK ( <i>in vitro</i> )    | unknown                | Yes                     | Desveaux et al., 2007<br>Chung et al., 2014 |
| AvrBsT   | <i>X. campestris</i>    | unknown                                                                                               | CaPIK1 ( <i>in vitro</i> )  | unknown                | Yes                     | Kim et al., 2014                            |
| XopN     | <i>X. campestris</i>    | APPRREHVS <sub>688</sub> APSSP                                                                        | unknown                     | Yes                    | unknown                 | Taylor et al., 2012                         |
| XopE2    | <i>X. euvesicatoria</i> | RGRFRQPT <sub>66</sub> LQPH<br>LSNGRSATYS <sub>133</sub> SLSY<br>AQPI S <sub>334</sub> PRTTAA         | unknown                     | unknown                | unknown                 | Dubrow et al., 2018                         |
| NopL     | <i>Rhizobium</i>        | RSGPSQAGLS <sub>139</sub> PSAT<br>SPSATPLLNPS <sub>148</sub> PPP<br>H<br>LTAERGRS <sub>198</sub> PQPS | SIPK ( <i>in vitro</i> )    | Yes                    | unknown                 | Zhang et al., 2011a<br>Ge et al., 2016      |
| NopP     | <i>Rhizobium</i>        | unknown                                                                                               | unknown                     | Yes                    | unknown                 | Skorpil et al., 2005                        |



**Supplemental Table 2. Related to Figure 2 and supplemental figure 4.**

AvrPtoB was expressed in Col-0 and *snrk2.8* protoplasts and total proteins were subjected to anti-GFP IP followed by tryptic digestion. Phosphorylated peptides were detected by LC-MS/MS with the parallel reaction monitoring method. Peptide phosphorylation ratios were determined using Skyline software. Phosphorylation intensity is reported for residue T111 as no unphosphorylated peptides were detected by MS. Data are means  $\pm$  SE of three biological replicates (separate transfections).

| Phosphorylated residue | Phosphorylation ratio     |                | SE              |                 |
|------------------------|---------------------------|----------------|-----------------|-----------------|
|                        | Col-0                     | <i>snrk2.8</i> | Col-0           | <i>snrk2.8</i>  |
| <b>S205</b>            | 93.88                     | 10.20          | $\pm$ 46.05     | $\pm$ 5.12      |
| <b>S210</b>            | 173.85                    | 17.90          | $\pm$ 85.40     | $\pm$ 8.81      |
| <b>S258</b>            | 40263.92                  | 4272.50        | $\pm$ 25060.68  | $\pm$ 2455.38   |
| <b>S217</b>            | 0.01                      | 0.01           | $\pm$ 0.001     | $\pm$ 0.003     |
| T111                   | Phosphorylation intensity |                | SE              |                 |
|                        | Col-0                     | <i>snrk2.8</i> | Col-0           | <i>snrk2.8</i>  |
| <b>T111</b>            | 3880000                   | 13500000       | $\pm$ 2837677.1 | $\pm$ 2478126.5 |

**Supplemental Table 3. Primers used in this study. Related to Methods.**

| <b>Name</b> | <b>Sequence 5' to 3'</b>      | <b>Purpose</b>           |
|-------------|-------------------------------|--------------------------|
| SnRK1.1-LP  | CACCATGTTCAAACGAGTAGATGAGTTT  | Full-length SnRK1.1 CDS  |
| SnRK1.1-RP  | GAGGACTCGGAGCTGAGCAAG         |                          |
| SnRK1.2-LP  | CACCATGGATCATTCAATAGATTTGGC   | Full-length SnRK1.2 CDS  |
| SnRK1.2-RP  | GATCACACGAAGCTCTGTAAGAAAGG    |                          |
| SnRK1.3-LP  | CACCATGGATGGATCATCGGAAAAAC    | Full-length SnRK1.3 CDS  |
| SnRK1.3-RP  | GAGGACACCTAGCTCTCTGAGAAACG    |                          |
| SnRK2.1-LP  | CACCATGGACAAGTATGACGTTGTC     | Full-length SnRK2.1 CDS  |
| SnRK2.1-RP  | AGCTTTGTCAGACTCTTGACAAGACTG   |                          |
| SnRK2.3-LP  | CACCATGGATCGAGCTCCGG          | Full-length SnRK2.3 CDS  |
| SnRK2.3-RP  | GAGAGCGTAAACTATCTCTCCGCTAC    |                          |
| SnRK2.4-LP  | CACCATGGACAAGTACGAGCTGG       | Full-length SnRK2.4 CDS  |
| SnRK2.4-RP  | ACTTATTCTCACTTCTCCACTTGCGTG   |                          |
| SnRK2.5-LP  | CACCATGGACAAGTATGAGGTTGTGAA   | Full-length SnRK2.5 CDS  |
| SnRK2.5-RP  | AGCTTTGGGAGGCTCTTGACAAGAATG   |                          |
| SnRK2.6-LP  | CACCATGGATCGACCAGCAGTGA       | Full-length SnRK2.6 CDS  |
| SnRK2.6-RP  | CATTGCGTACACAATCTCTCCGCTACTG  |                          |
| SnRK2.7-LP  | CACCATGGAGAGATACGACATCTTAAGAG | Full-length SnRK2.7 CDS  |
| SnRK2.7-RP  | TAGAGCACATACGAAATCACCATTTCTC  |                          |
| SnRK2.8-LP  | CACCATGGAGAGGTACGAAATAGTG     | Full-length SnRK2.8 CDS  |
| SnRK2.8-RP  | CAAAGGGGAAAGGAGATCAGCG        |                          |
| SnRK2.9-LP  | CACCATGGAGAAGTATGAGATGGTG     | Full-length SnRK2.9 CDS  |
| SnRK2.9-RP  | TGCGTAATCATCATACCATTCTTCATCA  |                          |
| SnRK2.10-LP | CACCATGGACAAGTACGAGCTTGTTAA   | Full-length SnRK2.10 CDS |
| SnRK2.10-RP | ACTGACTCGGACTTCTCCCATG        |                          |
| SnRK3.1-LP  | CACCATGGAGAAGAAAGGATCTGTGT    | Full-length SnRK3.1 CDS  |
| SnRK3.1-RP  | GTGCCAAGCTAATACAAAGTCGATCAA   |                          |
| SnRK3.2-LP  | CACCATGGAGAACAAACCAAGTGTATT   | Full-length SnRK3.2 CDS  |
| SnRK3.2-RP  | TGATGGTTCTTGCTCTCCTTGTTTCATC  |                          |
| SnRK3.6-LP  | CACCATGGATAAAAACGGCATAGTTT    | Full-length SnRK3.6 CDS  |
| SnRK3.6-RP  | ATGTATCACTTCAATCTTCTCATTGTTGC |                          |
| SnRK3.7-LP  | CACCATGGCTCAAGTACTATCTACAC    | Full-length SnRK3.7 CDS  |
| SnRK3.7-RP  | CTGTTCAATTTCAAGTGGCAAACA      |                          |
| SnRK3.8-LP  | CACCATGGAAAATAAGCCAAGTGTTTTG  | Full-length SnRK3.8 CDSS |
| SnRK3.8-RP  | AAACTTCAATGGTTCTTCTGTTCTTG    |                          |
| SnRK3.9-LP  | CACCATGGCGGAGAAAATCACG        | Full-length SnRK3.9 CDS  |
| SnRK3.9-RP  | TTCAGTGTCAGACGGCAAGAAAGAAATG  |                          |

| Name        | Sequence 5' to 3'              | Purpose                     |
|-------------|--------------------------------|-----------------------------|
| SnRK3.10-LP | CACCATGGAATCACTTCCCCAG         | Full-length SnRK3.10 CDS    |
| SnRK3.10-RP | CATGATGTCATTGTGCCATGAAAGAAC    |                             |
| SnRK3.11-LP | CACCATGACAAAGAAAATGAGAAGAGTGG  | Full-length SnRK3.11 CDS    |
| SnRK3.11-RP | AAACGTGATTGTTCTGAGAATCTCTGAC   |                             |
| SnRK3.12-LP | CACCATGAGTGGAAGCAGAAGGAAG      | Full-length SnRK3.12 CDS    |
| SnRK3.12-RP | TTGCTTTTGTCTTCAGCGGCTG         |                             |
| SnRK3.13-LP | CACCATGGTGGTAAGGAAGGTG         | Full-length SnRK3.13 CDS    |
| SnRK3.13-RP | ACGTCCTTTACTCTTGGCCTTGGTG      |                             |
| SnRK3.14-LP | CACCATGGTCCGAGCAAACC           | Full-length SnRK3.14 CDS    |
| SnRK3.14-RP | AGCAGGTGTAGAGGTCCAGAAAATG      |                             |
| SnRK3.15-LP | CACCATGGTAGATTCTGACCCGG        | Full-length SnRK3.15 CDS    |
| SnRK3.15-RP | CGACGTCGTATGTACTTGAGTTGGTTC    |                             |
| SnRK3.16-LP | CACCATGGTGAGAAGGCAAGAG         | Full-length SnRK3.16 CDS    |
| SnRK3.16-RP | AGTTACTATCTCTTGCTCCGGCGAG      |                             |
| SnRK3.17-LP | CACCATGTTGATCCCCAACAAAAATTA    | Full-length SnRK3.17 CDS    |
| SnRK3.17-RP | CTTTGCTGTTTCTTTCTTAACTTCGTTAT  |                             |
| SnRK3.19-LP | CACCATGTCTTTTACAATTCCTAGACTG   | Full-length SnRK3.18 CDS    |
| SnRK3.19-RP | CGGTTTGTGAGGAACTTTATAAACCG     |                             |
| SnRK3.20-LP | CACCATGGCTCAAGCCTTGG           | Full-length SnRK3.20 CDS    |
| SnRK3.20-RP | TTCAGTATCAGATGGCAAATACAATGCTTC |                             |
| SnRK3.21-LP | CACCATGGTGATAAAGGGAATGCG       | Full-length SnRK3.21 CDS    |
| SnRK3.21-RP | CGCTAAAAGCTCCTGTACTTGTGATG     |                             |
| SnRK3.22-LP | CACCATGCCAGAGATCGAGATTGC       | Full-length SnRK3.22 CDS    |
| SnRK3.22-RP | AATAGCCGCGTTTGTGACGACG         |                             |
| SnRK3.23-LP | CACCATGGCTTCTCGAACCAACG        | Full-length SnRK3.23 CDS    |
| SnRK3.23-RP | TGTCGACTGTTTTGCAATTGTCCG       |                             |
| SnRK3.24-LP | CACCATGGAGGAAGAACGG            | Full-length SnRK3.24 CDS    |
| SnRK3.24-RP | ACAATCCTCGGAAGAAGTGTATTATTA    |                             |
| SnRK3.25-LP | CACCATGGGATCCAACTTAACTTTAC     | Full-length SnRK3.25 CDS    |
| SnRK3.25-RP | GCAGTCACTACCAGAATTTTCATCAC     |                             |
| CPK2ΔC-LP   | CACCATGGGTAATGCTTGCGTT         | CPK2 C-terminal deleted CDS |
| CPK2ΔC-RP   | CACACCGTCAATCTGTACCCAT         |                             |
| CPK3ΔC-LP   | CACCATGGGCCACAGACACAGC         | CPK3 C-terminal deleted CDS |
| CPK3ΔC-RP   | CTCCCCATCTTCTCTAATCCACGG       |                             |
| CPK4ΔC-LP   | CACCATGGAGAAACCAAACCT          | CPK4 C-terminal deleted CDS |
| CPK4ΔC-RP   | AGCATGTTTCATCAACAATCCAAG       |                             |
| CPK5ΔC-LP   | CACCATGGGCAATTCTTGCC           | CPK5 C-terminal deleted CDS |
| CPK5ΔC-RP   | AACACCATTCTCACAGATCCATG        |                             |

| Name                   | Sequence 5' to 3'                        | Purpose                                 |
|------------------------|------------------------------------------|-----------------------------------------|
| CPK6ΔC-LP              | CACCATGGGCAATTCATGTCGT                   | CPK6 C-terminal deleted CDS             |
| CPK6ΔC-RP              | AACTCCATTCTCACAGATCCATG                  |                                         |
| CPK10ΔC-LP             | CACCATGGGTAAGTGAACGCC                    | CPK10 C-terminal deleted CDS            |
| CPK10ΔC-RP             | TTTCTTTGCATTCTGTATCCATGGG                |                                         |
| CPK11ΔC-LP             | CACCATGGAGACGAAGCCAAAC                   | CPK11 C-terminal deleted CDS            |
| CPK11ΔC-RP             | TGCTTGTTTCATCGACAATCCATG                 |                                         |
| CPK13ΔC-LP             | CACCATGGGAAACTGTTGCAGA                   | CPK13 C-terminal deleted CDS            |
| CPK13ΔC-RP             | TTTCTTTGCGTTCTGAATCCATGG                 |                                         |
| CPK26ΔC-LP             | CACCATGAAGCACAGCGGTGG                    | CPK26 C-terminal deleted CDS            |
| CPK26ΔC-RP             | AACTCCATTTTCACAGATCCAAGG                 |                                         |
| SnRK1.1 KA-LP          | CATAAGGTTGCTATCGCGATCCTCAATCGTC          | Generate SnRK1.1 kinase dead mutant     |
| SnRK1.1 KA-RP          | GACGATTGAGGATCGCGATAGCAACCTTATG          |                                         |
| SnRK2.6 KA-LP          | CTTGTTGCTGTTGCATATATCGAGAG               | Generate SnRK2.6 kinase dead mutant     |
| SnRK2.6 KA-RP          | CTCTCGATATATGCAACAGCAACAAG               |                                         |
| SnRK2.8 KA-LP          | GAGCTTTTCGCTGTTGCGTTCATCGAGCGAG          | Generate SnRK2.8 kinase dead mutant     |
| SnRK2.8 KA-RP          | CTCGCTCGATGAACGCAACAGCGAAAAGCTC          |                                         |
| CPK4ΔC KA-LP           | CTAATTACGCTTGCGCATCAATCCCAAAC            | Generate CPK4ΔC kinase dead mutant      |
| CPK4ΔC KA-RP           | GTTTTGGGATTGATGCGCAAGCGTAATTAG           |                                         |
| CPK5ΔC KA-LP           | GACTACGCTTGTGCGTCAATATCCAAG              | Generate CPK5ΔC kinase dead mutant      |
| CPK5ΔC KA-RP           | CTTGGATATTGACGCACAAGCGTAGTC              |                                         |
| AvrPtoB-LP             | CACCATGGCGGGTATCAATGGAGC                 | Clone Full-length AvrPtoB               |
| AvrPtoB-RP             | GGGGACTATTCTAAAAGC                       |                                         |
| AvrPtoB 307-RP         | TACATGTCTTTCAAGGGCCGTG                   | Clone AvrPtoB <sub>1-307</sub>          |
| AvrPtoB S258A -LP      | CCGGTCGACAGGGCCCCGCCACGCG                | Generate AvrPtoB S258A mutant           |
| AvrPtoB S258A-RP       | CGCGTGCGGGGGCCCTGTGACCGG                 |                                         |
| AvrPtoB S258D-LP       | CCGGTCGACAGGGACCCGCCACGCG                | Generate AvrPtoB S258D mutant           |
| AvrPtoB S258D-RP       | CGCGTGCGGGTCCCTGTGACCGG                  |                                         |
| AvrPtoB S205S210A-LP   | CAACAGGCGGCGGCAGCGCCAGTGAGGGCGCCACGCCAAC | Generate AvrPtoB S205AS210AS258A mutant |
| AvrPtoB S205S210A-RP   | GTTGGCGTGGGCGCCCTCACTGGCGCTGCCGCCGCTGTTG |                                         |
| AvrPtoB S205DS210D-LP  | CAACAGGCGGCGGATGCGCCAGTGAGGGATCCACGCCAAC | Generate AvrPtoB S205DS210DS258D mutant |
| AvrPtoB S205DS210D-RP  | GTTGGCGTGGGATCCCTCACTGGCGCATCCGCCGCTGTTG |                                         |
| snrk2.8 SALK_073395-LP | ATTTTCAAAGAGCTTTTCGC                     | snrk2.8 T-DNA line genotyping           |
| snrk2.8 SALK_073396-RP | GGTGATAGTTTCCGAGCTTC                     |                                         |

**Supplemental Table 4. Isolation list for PRM. Related to Figure 2.**

Modified and unmodified peptide sequences used to quantify phosphorylation by PRM are noted. CID = collision induced dissociation, m/z = mass to charge, z = charge state.

| Peptide sequence                 | Peptide modified sequence             | m/z      | z |
|----------------------------------|---------------------------------------|----------|---|
| AEARRTPEATADASAPR                | AEARRT[+80]PEATADASAPR                | 617.2899 | 3 |
| RAVHQQAASAPVR                    | RAVHQQAASAPVR                         | 464.2603 | 3 |
| RAVHQQAASAPVRSPTPTPASPAASSSGSSQR | RAVHQQAASAPVRSPTPTPASPAASSSGSSQR      | 786.9028 | 4 |
|                                  | RAVHQQAASAPVRSPTPTPASPAASSSGSSQR      | 629.7237 | 5 |
|                                  | RAVHQQAAS[+80]APVRSPTPTPASPAASSSGSSQR | 806.8944 | 4 |
|                                  | RAVHQQAASAPVRS[+80]PTPTPASPAASSSGSSQR | 806.8944 | 4 |
| AVHQQAASAPVR                     | AVHQQAASAPVR                          | 617.8362 | 2 |
|                                  | AVHQQAASAPVR                          | 412.2265 | 3 |
| AVHQQAASAPVRSPTPTPASPAASSSGSSQR  | AVHQQAASAPVRSPTPTPASPAASSSGSSQR       | 996.8343 | 3 |
|                                  | AVHQQAASAPVRSPTPTPASPAASSSGSSQR       | 747.8775 | 4 |
|                                  | AVHQQAAS[+80]APVRSPTPTPASPAASSSGSSQR  | 767.8691 | 4 |
|                                  | AVHQQAASAPVRS[+80]PTPTPASPAASSSGSSQR  | 1023.49  | 3 |
|                                  | AVHQQAASAPVRS[+80]PTPTPASPAASSSGSSQR  | 767.8691 | 4 |
| SPTPTPASPAASSSGSSQR              | SPTPTPASPAASSSGSSQR                   | 886.9241 | 2 |
|                                  | SPTPTPASPAASSSGSSQR                   | 591.6185 | 3 |
|                                  | SPTPTPAS[+80]PAASSSGSSQR              | 926.9073 | 2 |
| SSNTAASQTPVDRSPPR                | SSNTAASQTPVDRSPPR                     | 590.9625 | 3 |
|                                  | SSNTAASQTPVDRS[+80]PPR                | 925.9233 | 2 |
|                                  | SSNTAASQTPVDRS[+80]PPR                | 617.6179 | 3 |
|                                  | PSNTPPSNAPAPPPTGR                     | 828.411  | 2 |
|                                  | PSNT[+80]PPSNAPAPPPTGR                | 868.3942 | 2 |
| AALDPIASQFSQLR                   | AALDPIASQFSQLR                        | 757.9023 | 2 |
|                                  | AALDPIASQFS[+80]QLR                   | 797.8855 | 2 |

141 **Supplemental references**

142

143 **Anderson, J. C., Pascuzzi, P. E., Xiao, F., Sessa, G., and Martin, G. B.** (2006). Host-  
144 Mediated Phosphorylation of Type III Effector AvrPto Promotes Pseudomonas Virulence and  
145 Avirulence in Tomato. *Plant Cell* **18**:502–514.

146 **Chen, H., Chen, J., Li, M., Chang, M., Xu, K., Shang, Z., Zhao, Y., Palmer, I., Zhang, Y.,**  
147 **McGill, J., et al.** (2017). A Bacterial Type III Effector Targets the Master Regulator of  
148 Salicylic Acid Signaling, NPR1, to Subvert Plant Immunity. *Cell Host Microbe* **22**:777-  
149 788.e7.

150 **Chung, E.-H., El-Kasmi, F., He, Y., Loehr, A., and Dangl, J. L.** (2014). A Plant  
151 Phosphoswitch Platform Repeatedly Targeted by Type III Effector Proteins Regulates the  
152 Output of Both Tiers of Plant Immune Receptors. *Cell Host Microbe* **16**:484–494.

153 **Crooks, G. E., Hon, G., Chandonia, J.-M., and Brenner, S. E.** (2004). WebLogo: A Sequence  
154 Logo Generator. *Genome Res* **14**:1188–1190.

155 **Desveaux, D., Singer, A. U., Wu, A.-J., McNulty, B. C., Musselwhite, L., Nimchuk, Z.,**  
156 **Sondek, J., and Dangl, J. L.** (2007). Type III Effector Activation via Nucleotide Binding,  
157 Phosphorylation, and Host Target Interaction. *Plos Pathog* **3**:e48.

158 **Dubrow, Z., Sunitha, S., Kim, J.-G., Aakre, C. D., Giriya, A. M., Sobol, G., Teper, D., Chen,**  
159 **Y. C., Ozbaki-Yagan, N., Vance, H., et al.** (2018). Tomato 14-3-3 Proteins Are Required for  
160 Xv3 Disease Resistance and Interact with a Subset of Xanthomonas euvesicatoria Effectors.  
161 *Mol Plant-microbe Interactions Mpmi* **31**:1301–1311.

162 **Earley, K. W., Haag, J. R., Pontes, O., Opper, K., Juehne, T., Song, K., and Pikaard, C. S.**  
163 (2006). Gateway-compatible vectors for plant functional genomics and proteomics. *Plant J*  
164 **45**:616–629.

165 **Ge, Y.-Y., Xiang, Q.-W., Wagner, C., Zhang, D., Xie, Z.-P., and Staehelin, C.** (2016). The  
166 type 3 effector NopL of Sinorhizobium sp. strain NGR234 is a mitogen-activated protein  
167 kinase substrate. *J Exp Bot* **67**:2483–2494.

168 **Giska, F., Lichočka, M., Piechocki, M., Dadlez, M., Schmelzer, E., Hennig, J., and**  
169 **Krzymowska, M.** (2013). Phosphorylation of HopQ1, a Type III Effector from Pseudomonas  
170 syringae , Creates a Binding Site for Host 14-3-3 Proteins. *Plant Physiol* **161**:2049–2061.

171 **Gu, Y., and Innes, R. W.** (2011). The KEEP ON GOING protein of Arabidopsis recruits the  
172 ENHANCED DISEASE RESISTANCE1 protein to trans-Golgi network/early endosome  
173 vesicles. *Plant Physiol* **155**:1827–38.

- 174 **Kim, D. S., Choi, H. W., and Hwang, B. K.** (2014). Pepper mildew resistance locus O interacts  
175 with pepper calmodulin and suppresses Xanthomonas AvrBsT-triggered cell death and  
176 defense responses. *Planta* **240**:827–839.
- 177 **Li, W., Yadeta, K. A., Elmore, J. M., and Coaker, G.** (2013). The Pseudomonas syringae  
178 Effector HopQ1 Promotes Bacterial Virulence and Interacts with Tomato 14-3-3 Proteins in a  
179 Phosphorylation-Dependent Manner. *Plant Physiol* **161**:2062–2074.
- 180 **MacLean, B., Tomazela, D. M., Shulman, N., Chambers, M., Finney, G. L., Frewen, B.,  
181 Kern, R., Tabb, D. L., Liebler, D. C., and MacCoss, M. J.** (2010). Skyline: an open source  
182 document editor for creating and analyzing targeted proteomics experiments. *Bioinform Oxf  
183 Engl* **26**:966–8.
- 184 **Minkoff, B. B., Burch, H. L., and Sussman, M. R.** (2013). Methods in Molecular Biology.  
185 *Methods Mol Biology Clifton N J* **1062**:353–379.
- 186 **Nakagawa, T., Suzuki, T., Murata, S., Nakamura, S., Hino, T., Maeo, K., Tabata, R.,  
187 Kawai, T., Tanaka, K., Niwa, Y., et al.** (2007). Improved Gateway Binary Vectors: High-  
188 Performance Vectors for Creation of Fusion Constructs in Transgenic Analysis of Plants.  
189 *Biosci Biotechnology Biochem* **71**:2095–2100.
- 190 **Ntoukakis, V., Mucyn, T. S., Gimenez-Ibanez, S., Chapman, H. C., Gutierrez, J. R.,  
191 Balmuth, A. L., Jones, A. M. E., and Rathjen, J. P.** (2009). Host Inhibition of a Bacterial  
192 Virulence Effector Triggers Immunity to Infection. *Science* **324**:784–787.
- 193 **Skorpil, P., Saad, M. M., Boukli, N. M., Kobayashi, H., Ares-Orpel, F., Broughton, W. J.,  
194 and Deakin, W. J.** (2005). NopP, a phosphorylated effector of Rhizobium sp. strain  
195 NGR234, is a major determinant of nodulation of the tropical legumes Flemingia congesta  
196 and Tephrosia vogelii: NopP of Rhizobium sp. NGR234. *Mol Microbiol* **57**:1304–1317.
- 197 **Taylor, K. W., Kim, J.-G., Su, X. B., Aakre, C. D., Roden, J. A., Adams, C. M., and  
198 Mudgett, M. B.** (2012). Tomato TFT1 Is Required for PAMP-Triggered Immunity and  
199 Mutations that Prevent T3S Effector XopN from Binding to TFT1 Attenuate Xanthomonas  
200 Virulence. *Plos Pathog* **8**:e1002768.
- 201 **Tyanova, S., Temu, T., and Cox, J.** (2016). The MaxQuant computational platform for mass  
202 spectrometry-based shotgun proteomics. *Nat Protoc* **11**:2301–2319.
- 203 **Xiao, F., Giavalisco, P., and Martin, G. B.** (2007). Pseudomonas syringae Type III Effector  
204 AvrPtoB Is Phosphorylated in Plant Cells on Serine 258, Promoting Its Virulence Activity. *J  
205 Biol Chem* **282**:30737–30744.
- 206 **Yeam, I., Nguyen, H. P., and Martin, G. B.** (2009). Phosphorylation of the Pseudomonas  
207 syringae effector AvrPto is required for FLS2/BAK1-independent virulence activity and  
208 recognition by tobacco. *Plant J Cell Mol Biology* **61**:16–24.
- 209 **Yoo, S.-D., Cho, Y.-H., and Sheen, J.** (2007). Arabidopsis mesophyll protoplasts: a versatile  
210 cell system for transient gene expression analysis. *Nat Protoc* **2**:1565–1572.

211 **Zhang, L., Chen, X.-J., Lu, H.-B., Xie, Z.-P., and Staehelin, C.** (2011a). Functional Analysis  
212 of the Type 3 Effector Nodulation Outer Protein L (NopL) from *Rhizobium* sp. NGR234:  
213 SYMBIOTIC EFFECTS, PHOSPHORYLATION, AND INTERFERENCE WITH  
214 MITOGEN-ACTIVATED PROTEIN KINASE SIGNALING. *J Biol Chem* **286**:32178–  
215 32187.

216 **Zhang, T., Lei, J., Yang, H., Xu, K., Wang, R., and Zhang, Z.** (2011b). An improved method  
217 for whole protein extraction from yeast *Saccharomyces cerevisiae*. *Yeast Chichester Engl*  
218 **28**:795–8.

219
